# Supplementary material for: The Sum of Its Parts—Effects of Gastric Distention, Nutrient Content and Sensory Stimulation on Brain Activation
Source: PubMed Central journal article supplement (PMC3948722; doi:10.1371/journal.pone.0090872), 2014-03-10
Supplement: pone.0090872.s001.pdf [file pone.0090872.s001.pdf]

## Supporting information

**Table S1.** Changes in subjective ratings during the three sessions<sup>1</sup>.

| Time point | Fullness<br>(mm)      |                         |                            | Desire to eat<br>(mm) |                          |                             | Anxiety<br>(mm)       |                         |                            |
|------------|-----------------------|-------------------------|----------------------------|-----------------------|--------------------------|-----------------------------|-----------------------|-------------------------|----------------------------|
|            | <i>Oral -<br/>Cal</i> | <i>Gastric-<br/>Cal</i> | <i>Gastric-<br/>NonCal</i> | <i>Oral -<br/>Cal</i> | <i>Gastric -<br/>Cal</i> | <i>Gastric -<br/>NonCal</i> | <i>Oral -<br/>Cal</i> | <i>Gastric-<br/>Cal</i> | <i>Gastric-<br/>NonCal</i> |
| Baseline   | 23.43                 | 18.07                   | 20.40                      | 72.57                 | 70.92                    | 72.93                       | 7.93                  | 8.07                    | 7.00                       |
| Δ 2.5      | 28.0*                 | 14.79                   | 11.60                      | -14.71*               | -2.36                    | -6.93                       | 5.64*                 | -0.93                   | 0.86                       |
| Δ 5        | 51.57*                | 29.79                   | 26.93                      | -44.00*               | -12.36                   | -12.26                      | 5.64*                 | -0.21                   | 2.29                       |
| Δ 10       | 35.29*                | 29.07                   | 26.27                      | -29.00*               | -9.50                    | -6.93                       | -2.93                 | -3.79                   | -2.00                      |
| Δ 15       | 32.29                 | 24.07                   | 23.60                      | -30.43                | -8.07                    | -3.90                       | -2.93                 | -5.21                   | -4.86                      |
| Δ 30       | 21.47                 | 25.50                   | 13.60*                     | -20.43                | -11.64                   | -0.93                       | -3.64                 | -4.50                   | -3.43                      |

<sup>1</sup> Shown are mean baseline measurement (n = 14) and changes from baseline at 2.5, 5, 10, 15 and 30 minutes. \* and \*\* represent significant differences with other conditions at that time point.
