# Supplementary material for: The Sum of Its Parts—Effects of Gastric Distention, Nutrient Content and Sensory Stimulation on Brain Activation
Source: PubMed Central journal article supplement (PMC3948722; doi:10.1371/journal.pone.0090872), 2014-03-10
Supplement: pone.0090872.s002.pdf [file pone.0090872.s002.pdf]

## Supporting information

**Table S2.** Changes in blood parameters during the three sessions. <sup>1</sup>

| Time point | Glucose<br>(mmol/L) |                      |                         | Insulin<br>(pmol/L) |                      |                         | CCK-8<br>(pmol/L) |                      |                         |
|------------|---------------------|----------------------|-------------------------|---------------------|----------------------|-------------------------|-------------------|----------------------|-------------------------|
|            | <i>Oral - Cal</i>   | <i>Gastric - Cal</i> | <i>Gastric - NonCal</i> | <i>Oral - Cal</i>   | <i>Gastric - Cal</i> | <i>Gastric - NonCal</i> | <i>Oral - Cal</i> | <i>Gastric - Cal</i> | <i>Gastric - NonCal</i> |
| Baseline   | 4.76                | 4.58                 | 4.84                    | 31.06               | 31.72                | 35.19                   | 0.38              | 0.39                 | 0.53                    |
| Δ 2.5      | 0.08                | 0.00                 | 0.09                    | -4.49               | -5.00                | -5.72                   | 0.027             | 0.39                 | 0.05                    |
| Δ 5        | 0.05                | 0.04                 | 0.06                    | -5.50               | 0.00                 | -6.23                   | 0.05              | 0.83                 | 0.09                    |
| Δ 10       | 0.22                | 0.45                 | 0.06                    | 7.24                | 52.86                | -6.23                   | 0.76              | 2.17*                | 0.13                    |
| Δ 15       | 0.60                | 0.98                 | 0.04                    | 51.92*              | 149.24**             | -6.73                   | 1.09              | 1.09                 | 0.13                    |
| Δ 30       | 1.65                | 1.69                 | 0.08                    | 209.41*             | 348.15**             | -8.76                   | 0.85              | 1.17                 | 0.53                    |

| Time point | Ghrelin<br>total<br>(pmol/L) |                      |                         | Ghrelin<br>active<br>(pmol/L) |                      |                         |  |
|------------|------------------------------|----------------------|-------------------------|-------------------------------|----------------------|-------------------------|--|
|            | <i>Oral - Cal</i>            | <i>Gastric - Cal</i> | <i>Gastric - NonCal</i> | <i>Oral - Cal</i>             | <i>Gastric - Cal</i> | <i>Gastric - NonCal</i> |  |
| Baseline   | 3132                         | 3061                 | 3132                    | 293                           | 316                  | 340                     |  |
| Δ 2.5      | -16.18                       | 56.63                | 71.13                   | -39.63                        | 64.27                | 22.98                   |  |
| Δ 5        | -22.92                       | 102.48               | 136.19                  | -4.66                         | 9.66                 | 60.94                   |  |
| Δ 10       | 5.39                         | 182.71               | 111.58                  | 13.65                         | 88.58                | 89.91                   |  |
| Δ 15       | -45.5                        | 157.43               | 188.10                  | -45.62                        | -106.56              | 109.22                  |  |
| Δ 30       | -267.32                      | 334.40               | 70.11                   | -2.00                         | 61.27                | 79.25                   |  |

<sup>1</sup> Shown are mean baseline measurement (n = 14) and changes from baseline at 2.5, 5, 10, 15 and 30 minutes. \* and \*\* represent significant differences with other conditions at that time point. Conversion from metric to SI units was done as follows: insulin mIU/L × 7.241 = pmol/L, total ghrelin pg/ml × 0.37 = pmol/l and, active ghrelin pg/ml × 0.33 = pmol/.
